# Supplementary material for: TGFB1/CXCL5 axis regulation by LCN2 overexpression: a promising strategy to inhibit colorectal cancer metastasis and enhance prognosis
Source: Front Immunol. 2025 Apr 17;16:1548635. doi: 10.3389/fimmu.2025.1548635 (PMC12043584; doi:10.3389/fimmu.2025.1548635)
Supplement: Supplementary file 2 [file Table1.xlsx]

## Sheet: HColA180Su19详细病理资料
组织类型	手术时间	生存状态	随访时间	201507生存期	说明	组织编码	肿瘤手术器官		性别	年龄		患者主诉	本人肿瘤史	家族肿瘤史	远处转移部位	是否为原发器官	是否为转移，原发灶为	病理分型		病理分级	肿瘤大小CM	肿瘤部位	肿瘤描述	肿瘤质地	肿瘤切面颜色	包膜	病理形态	肿瘤边界	浸润程度	是否有累犯器官（有、无、不详）	累犯器官详情	脉管侵犯	淋巴结侵犯	淋巴结总数	阳性数	T	N	M	AJCC第七版临床分期	组织编码	HCol-Ade180Sur-07			201507生存期	生存状态	AJCC第七版临床分期
癌/癌旁	2009-1-15	生存	2015.7	78		D15A1454	结肠		男	72					无	是	否	腺癌		Ⅱ级	6.5×5×1.7cm	右半结肠	隆起型，侵至浆膜											17	0	T3	N0	M0	2A期	D15A1454	癌/癌旁			78	0	2
癌/癌旁	2009-1-19	死亡	2009-02-23	1		D15A1455	结肠		女	57					无	是	否	腺癌		Ⅱ级	6.5×5.5×2cm	右半结肠	盘状隆起型，侵至深肌层											2	2	T2	N1b	M0	3A期	D15A1455	癌/癌旁			1	1	3
癌/癌旁	2009-1-19	死亡	2010-02-21	13		D15A1456	结肠		男	76					无	是	否	腺癌		Ⅱ级	5.5×4.5×2cm	降结肠	浸润溃疡型，侵至浆膜											1	0	T3	N0	M0	2A期	D15A1456	癌/癌旁			13	1	2
癌/癌旁	2009-01-20	死亡	2009-08-23	7		D15A3044	结肠		男	61					无	是	否	腺癌		Ⅱ级	——	右半结肠					溃疡型		浆膜外					20	3	T4a	N1b	M0	3B期	D15A3044				7	1	3
癌/癌旁	2009-01-20	生存	2016-12-31	78		D15A3045	结肠		男	72					无	是	否	腺癌		Ⅲ级	——	右半结肠					溃疡型		浆膜					24	1	T3	N1a	M0	3B期	D15A3045				78	0	3
癌/癌旁	2009-1-22	生存	2015.7	78		D15A1458	结肠		女	63					无	是	否	腺癌，部分为粘液腺癌		Ⅱ级	4.5×3.5×1.5cm	乙状结肠	盘状隆起型，侵至浆膜											6	0	T3	N0	M0	2A期	D15A1458	癌/癌旁			78	0	2
癌/癌旁	2009-2-1	生存	2015.7	77		D15A1461	结肠		女	78					无	是	否	管状腺癌，部分为粘液腺癌		Ⅱ级	7×5×1cm	升结肠	隆起型，侵至浆膜											12	9	T3	N2b	M0	3C期	D15A1461	癌/癌旁			77	0	3
癌/癌旁	2009-2-2	死亡	2009-09-02	7		D15A1464	结肠		男	63					无	是	否	腺癌		Ⅲ级	5.5×4.5×1.5cm	乙结肠	环周浸润型，侵至浆膜外									淋巴管		7	7	T4a	N2b	M0	3C期	D15A1464	癌/癌旁			7	1	3
癌/癌旁	2009-2-4	死亡	2010-12-17	22		D15A1462	结肠		男	78					输尿管旁及髋血管旁见癌结节	是	否	腺癌		Ⅰ-Ⅱ级	7.5×3×1.5cm	乙结肠	溃疡型，侵至外膜，输尿管旁及髋血管旁见癌结节											10	0	T3	N0	M1b	4B期	D15A1462	癌/癌旁			22	1	4
癌/癌旁	2009-2-12	生存	2015.7	77		D15A1505	结肠		男	62					无	是	否	腺癌		Ⅰ-Ⅱ级	2.5×2×0.5cm	升结肠	隆起型，侵至浆膜											8	0	T3	N0	M0	2A期	D15A1505	癌/癌旁			77	0	2
癌/癌旁	2009-02-17	生存	2016-12-31	77		D15A2846	结肠		男	59					无	是	否	粘液腺癌		Ⅱ级	7*6cm	乙状结肠							浆膜					16	0	T3	N0	M0	2A期	D15A2846				77	0	2
癌/癌旁	2009-02-17	死亡	2010-01-16	11		D15A3048	结肠		女	73					无	是	否	腺癌		Ⅱ-Ⅲ级	4*3.5*1.5cm	乙状结肠					盘状型		浆膜外					10	9	T4a	N2b	M0	3C期	D15A3048				11	1	3
癌/癌旁	2009-2-19	生存	2015.7	77		D15A1508	结肠		男	78					无	是	否	腺癌		Ⅱ级	5×4×2cm	升结肠	隆起型，侵至浆膜层											7	0	T3	N0	M0	2A期	D15A1508	癌/癌旁			77	0	2
癌/癌旁	2009-2-26	死亡	2012-10-15	44		D15A1510	结肠		女	50					无	是	否	腺癌		Ⅱ级	4×3.5×1cm	结肠肝曲	浸润溃疡型，侵至浆膜外											3	0	T4a	N0	M0	2B期	D15A1510	癌/癌旁			44	1	2
癌/癌旁	2009-2-26	生存	2015.7	77		D15A1513	结肠		女	83					无	是	否	腺癌		Ⅰ-Ⅱ级	3×3×2cm	乙状结肠	隆起型，侵至深肌层											2	0	T2	N0	M0	1期	D15A1513				77	0	1
癌/癌旁	2009-03-04	死亡	2011-04-09	25		D15A3049	结肠		女	63					肝脏	是	否	腺癌		Ⅱ级	——	升结肠					溃疡型		外膜外					14	3	T4a	N1b	M1a	4A期	D15A3049				25	1	4
癌/癌旁	2009-3-10	生存	2015.7	76		D15A1556	结肠		男	73					无	是	否	腺癌		Ⅰ-Ⅱ级	11×6×2cm	结肠肝曲	隆起型，侵至浆膜											16	0	T3	N0	M0	2A期	D15A1556	癌/癌旁			76	0	2
癌/癌旁	2009-03-10	死亡	2011-02-12	23		D15A3051	结肠		女	60					肝脏	是	否	腺癌		Ⅱ级	——	乙状结肠					溃疡型		浆膜外脂肪组织					10	1	T4b	N1a	M1a	4A期	D15A3051				23	1	4
癌/癌旁	2009-3-11	死亡	2012-05-24	38		D15A1557	结肠		男	68					无	是	否	管状腺癌		Ⅱ级	6×4×1cm	结肠肝曲	环周浸润型，侵至浆膜外											15	0	T4a	N0	M0	2B期	D15A1557	癌/癌旁			38	1	2
癌/癌旁	2009-3-11	死亡	2010-04-29	13		D15A1558	结肠		女	87					无	是	否	腺癌，部分为粘液腺癌		Ⅰ-Ⅱ级	6×4×1cm	右半结肠	浸润溃疡型，侵至浆膜外脂肪											13	2	T4b	N1b	M0	3C期	D15A1558	癌/癌旁			13	1	3
癌/癌旁	2009-3-12	死亡	2009-11-23	8		D15A1559	结肠		女	52					无	是	否	腺癌		Ⅱ-Ⅲ级	7×5×2.5cm	乙状结肠	环周浸润型，侵至浆膜外											17	0	T4a	N0	M0	2B期	D15A1559	癌/癌旁			8	1	2
癌/癌旁	2009-3-12	生存	2015.7	76		D15A1560	结肠		女	51					无	是	否	腺癌		Ⅱ级	2.7×1.7×1.3cm	直乙结肠	隆起型，侵至粘膜下层											1	0	T1	N0	M0	1期	D15A1560	癌/癌旁			76	0	1
癌/癌旁	2009-3-23	生存	2015.7	76		D15A1563	结肠		女	61					无	是	否	腺癌		Ⅱ级	3×3×2cm	右半结肠	溃疡型，侵至浆膜											9	0	T3	N0	M0	2A期	D15A1563	癌/癌旁			76	0	2
癌/癌旁	2009-3-23	死亡	2010-03-04	12		D15A1564	结肠		女	48					无	是	否	腺癌		Ⅱ-Ⅲ级	1.5×1×1cm	横结肠	溃疡型，侵至浆膜，肠壁见癌结节											2	0	T3	N0	M0	2A期	D15A1564	癌/癌旁			12	1	2
癌/癌旁	2009-3-23	生存	2015.7	76		D15A1565	结肠		女	59					无	是	否	腺癌		Ⅱ级	3×2.5×1cm	乙结肠	盘状隆起型，侵至深肌层											4	0	T2	N0	M0	1期	D15A1565	癌/癌旁			76	0	1
癌/癌旁	2009-03-23	生存	2016-12-31	76		D15A3052	结肠		男	61					无	是	否	腺癌		Ⅱ级	——	乙状结肠					溃疡型		浆膜外					11	2	T4a	N1b	M0	3B期	D15A3052				76	0	3
癌/癌旁	2009-3-26	死亡	2012-07-20	40		D15A1566	结肠		女	77					无	是	否	管状乳头状腺癌		Ⅱ级	4×4×3cm	乙结肠	隆起型，侵至肌层											6	0	T2	N0	M0	1期	D15A1566	癌/癌旁			40	1	1
癌/癌旁	2009-3-26	死亡	2012-09-24	42		D15A1567	结肠		男	78					无	是	否	腺癌		Ⅱ级	5×5×1.5cm	升结肠	盘状隆起型，侵至浆膜											12	1	T3	N1a	M0	3B期	D15A1567	癌/癌旁			42	1	3
癌/癌旁	2009-3-31	死亡	2011-12-24	33		D15A1571	结肠		女	79					无	是	否	管状腺癌		Ⅱ级	7×5×2cm	乙状结肠	环周浸润型，侵至浆膜层											5	0	T3	N0	M0	2A期	D15A1571	癌/癌旁			33	1	2
癌/癌旁	2009-4-2	生存	2015.7	75		D15A1572	结肠		男	81					无	是	否	腺癌		Ⅱ级	4×3×1cm	乙结肠	溃疡型，侵至浆膜											5	2	T3	N1b	M0	3B期	D15A1572	癌/癌旁			75	0	3
癌/癌旁	2009-4-7	生存	2015.7	75		D15A1573	结肠		男	85					无	是	否	腺癌		Ⅰ-Ⅱ级	4.3×2×0.5cm	升结肠	浸润溃疡型，侵至外膜											11	0	T3	N0	M0	2A期	D15A1573	癌/癌旁			75	0	2
癌/癌旁	2009-4-9	死亡	2012-08-09	40		D15A1574	结肠		男	90					无	是	否	腺癌		Ⅱ级	7×5×5cm	乙状结肠	隆起型，侵至浆膜外											4	0	T4a	N0	M0	2B期	D15A1574	癌/癌旁			40	1	2
癌/癌旁	2009-4-9	生存	2015.7	75		D15A1575	结肠		女	60					无	是	否	腺癌		Ⅱ级	2.5×2×1.7cm	乙状结肠	浸润溃疡型，侵至浆膜层													T3	N0	M0	2A期	D15A1575				75	0	2
癌/癌旁	2009-4-15	生存	2015.7	75		D15A1579	结肠		男	73					无	是	否	腺癌		Ⅱ级	3.5×3×1cm	降结肠	溃疡型，侵至浆膜层											1	0	T3	N0	M0	2A期	D15A1579	癌/癌旁			75	0	2
癌/癌旁	2009-4-16	生存	2015.7	75		D15A1614	结肠		女	54					无	是	否	腺癌		Ⅱ级	3.5×3×2cm	降结肠	盘状隆起型，侵至浆膜层											5	0	T3	N0	M0	2A期	D15A1614	癌/癌旁			75	0	2
癌/癌旁	2009-4-27	生存	2015.7	75		D15A1617	结肠		男	80					无	是	否	腺癌		Ⅱ级	8×7×1cm	右半结肠	环周浸润型，侵至浆膜											4	0	T3	N0	M0	2A期	D15A1617	癌/癌旁			75	0	2
癌/癌旁	2009-4-29	生存	2015.7	75		D15A1619	结肠		女	65					无	是	否	管状乳头状腺癌		Ⅰ-Ⅱ级	4×3.5×1cm	升结肠	隆起型，侵至浆膜											10	0	T3	N0	M0	2A期	D15A1619	癌/癌旁			75	0	2
癌/癌旁	2009-4-29	生存	2015.7	75		D15A1620	结肠		女	59					无	是	否	腺癌		Ⅱ级	4.5×3.5×1.2cm	乙状结肠	浸润溃疡型，侵至浆膜											13	0	T3	N0	M0	2A期	D15A1620	癌/癌旁			75	0	2
癌/癌旁	2009-4-30	生存	2015.7	75		D15A1622	结肠		男	79					无	是	否	腺癌		Ⅰ-Ⅱ级	4×4×1cm	降结肠	隆起型，侵至浆膜											2	0	T3	N0	M0	2A期	D15A1622	癌/癌旁			75	0	2
癌/癌旁	2009-5-5	死亡	2010-06-09	13		D15A1624	结肠		女	76					无	是	否	腺癌		Ⅱ级	3.5×3.5×1cm	乙结肠	环周浸润型，侵至浆膜外									淋巴管		3	2	T4a	N1b	M0	3B期	D15A1624	癌/癌旁			13	1	3
癌/癌旁	2009-5-7	生存	2015.7	74		D15A1625	结肠		女	76					无	是	否	腺癌		Ⅰ-Ⅱ级	8×6×1cm	升结肠	浸润溃疡型，侵至浆膜											9	0	T3	N0	M0	2A期	D15A1625	癌/癌旁			74	0	2
癌/癌旁	2009-5-7	死亡	2012-08-23	39		D15A1626	结肠		男	63					无	是	否	腺癌		Ⅰ-Ⅱ级	5×3×1.5cm	乙状结肠	浸润溃疡型，侵至浆膜外											5	2	T4a	N1b	M0	3B期	D15A1626	癌/癌旁			39	1	3
癌/癌旁	2009-5-13	生存	2015.7	74		D15A1630	结肠		女	44					无	是	否	腺癌		Ⅱ级	8×8×4cm	升结肠	隆起型，侵至深肌层											11	0	T2	N0	M0	1期	D15A1630	癌/癌旁			74	0	1
癌/癌旁	2009-5-22	死亡	2010-06-16	13		D15A1663	结肠		男	73					无	是	否	腺癌		Ⅱ级	5.5×3.5×2cm	乙结肠					隆起型		浆膜层					4	0	T3	N0	M0	2A期	D15A1663	癌/癌旁			13	1	2
癌/癌旁	2009-6-9	生存	2015.7	73		D15A1732	结肠		男	79					无	是	否	腺癌		Ⅰ-Ⅱ级	6×3×1cm	升结肠					溃疡型		浆膜					11	0	T3	N0	M0	2A期	D15A1732	癌/癌旁			73	0	2
癌/癌旁	2009-6-10	生存	2015.7	73		D15A1733	结肠		男	55					无	是	否	腺癌		Ⅱ-Ⅲ级	5×4×1cm	结肠肝曲					环周浸润型		浆膜外					5	3	T4a	N1b	M0	3B期	D15A1733	癌/癌旁			73	0	3
癌/癌旁	2009-6-11	生存	2015.7	73		D15A1735	结肠		女	65					无	是	否	腺癌		Ⅱ级	4×3×1cm	乙结肠					溃疡浸润型		浆膜					2	0	T3	N0	M0	2A期	D15A1735	癌/癌旁			73	0	2
癌/癌旁	2009-6-17	生存	2015.7	73		D15A1738	结肠		男	75					无	是	否	腺癌		Ⅱ级	5×3×3cm	升结肠					溃疡型		浆膜					15	0	T3	N0	M0	2A期	D15A1738				73	0	2
癌/癌旁	2009-6-18	生存	2015.7	73		D15A1739	结肠		女	60					无	是	否	管状腺癌		Ⅱ级	5×5×1cm	乙结肠					浸润溃疡型		浆膜					12	0	T3	N0	M0	2A期	D15A1739				73	0	2
癌/癌旁	2009-6-18	死亡	2010-01-03	7		D15A1740	结肠		女	73					无	是	否	腺癌		Ⅱ级	8×5×2.5cm	右半结肠					溃疡型		浆膜					11	1	T3	N1a	M0	3B期	D15A1740	癌/癌旁			7	1	3
癌/癌旁	2009-6-22	生存	2015.7	73		D15A1741	结肠		男	81					无	是	否	腺癌		Ⅱ级	8×7×1.5cm	左半结肠					环周浸润型		浆膜层					8	1	T3	N1a	M0	3B期	D15A1741	癌/癌旁			73	0	3
癌/癌旁	2009-6-25	生存	2015.7	73		D15A1742	结肠		男	61					无	是	否	腺癌		Ⅰ-Ⅱ级	4.5×3.5×1.5cm	降结肠					隆起型		深肌层					5	0	T2	N0	M0	1期	D15A1742	癌/癌旁			73	0	1
癌/癌旁	2009-6-26	死亡	2010-10-31	16		D15A1743	结肠		男	65					无	是	否	粘液腺癌		Ⅲ级	6×5×1.3cm	结肠	累及小肠				环周浸润型		浆膜层	有	累及小肠	淋巴管		3	3	T4b	N1b	M0	3C期	D15A1743	癌/癌旁			16	1	3
癌/癌旁	2009-6-30	死亡	2010-10-05	16		D15A1744	结肠		男	61					肝	是	否	腺癌		Ⅱ-Ⅲ级	4×4×3cm	直乙结肠					浸润溃疡型		浆膜外					10	6	T4a	N2a	M1a	4A期	D15A1744	癌/癌旁			16	1	4
癌/癌旁	2009-7-6	生存	2015.7	72		D15A1758	结肠		女	55					无	是	否	粘液腺癌		Ⅱ-Ⅲ级	11×6×3cm	升结肠					环周浸润型		浆膜层					5	0	T3	N0	M0	2A期	D15A1758	癌/癌旁			72	0	2
癌/癌旁	2009-7-13	死亡	2011-04-18	21		D15A1765	结肠		男	55					无	是	否	腺癌		Ⅱ级	4×2.5×1cm	乙结肠					环周浸润型		浆膜外					4	0	T4a	N0	M0	2B期	D15A1765	癌/癌旁			21	1	2
癌/癌旁	2009-7-21	生存	2015.7	72		D15A1767	结肠		男	83					无	是	否	腺癌		Ⅰ级	5×3×2cm	升结肠					隆起型		浆膜层					6	0	T3	N0	M0	2A期	D15A1767	癌/癌旁			72	0	2
癌/癌旁	2009-7-28	生存	2015.7	72		D15A1762	结肠		女	69					无	是	否	腺癌		Ⅱ级	8×5×4cm	横结肠					隆起型		浆膜外					4	0	T4a	N0	M0	2B期	D15A1762	癌/癌旁			72	0	2
癌/癌旁	2009-7-31	生存	2015.7	72		D15A1764	结肠		女	80					无	是	否	腺癌		Ⅱ-Ⅲ级	6×5.5×1cm	升结肠					浸润溃疡型		浆膜外					10	1	T4a	N1a	M0	3B期	D15A1764	癌/癌旁			72	0	3
癌/癌旁	2009-8-3	生存	2015.7	71		D15A1810	结肠		男	57					无	是	否	腺癌		Ⅰ级	4×3×1.5cm	升结肠					隆起型		浆膜层					30	0	T3	N0	M0	2A期	D15A1810				71	0	2
癌/癌旁	2009-08-03	生存	2015-07-31	71		D15A1990	结肠		男	43					无	是	否	腺癌，部分粘液腺癌		Ⅱ级	4*3*1.5	右半结肠					溃疡型		浆膜					6	0	T3	N0	M0	2A期	D15A1990		T3N0M0		71	0	2
癌/癌旁	2009-8-10	生存	2015.7	71		D15A1813	结肠		女	82					无	是	否	腺癌		Ⅱ-Ⅲ级	4×4×1cm	横结肠					浸润溃疡型		浆膜					10	1	T3	N1a	M0	3B期	D15A1813	癌/癌旁			71	0	3
癌/癌旁	2009-8-14	生存	2015.7	71		D15A1814	结肠		女	69					无	是	否	腺癌		Ⅰ-Ⅱ级	2×2×1.5cm	升结肠					隆起型		浅肌层					10	0	T2	N0	M0	1期	D15A1814	癌/癌旁			71	0	1
癌/癌旁	2009-08-14	生存	2015-07-31	71		D15A1991	结肠		男	83					无	是	否	腺癌		Ⅱ级	4*2*1	降结肠					环周浸润型		浆膜外					4	0	T4a	N0	M0	2B期	D15A1991		T3N0M0		71	0	2
癌/癌旁	2009-8-19	生存	2015.7	71		D15A1815	结肠		女	46					无	是	否	腺癌		Ⅱ级	6×6×0.7cm	乙状结肠					溃疡型		浆膜					5	0	T3	N0	M0	2A期	D15A1815	癌/癌旁			71	0	2
癌/癌旁	2009-09-02	死亡	2009-09-13	0.37		D15A1993	结肠		男	82					无	是	否	腺癌		Ⅲ级	7*6*1	结肠脾曲					隆起型		浆膜层					10	7	T3	N2b	M0	3C期	D15A1993		T3N2M0		0.37	1	3
癌/癌旁	2009-9-3	死亡	2015-04-19	67		D15A1820	结肠		女	78					无	是	否	管状腺癌		Ⅰ-Ⅱ级	4.5×4×1.5cm	乙结肠					盘状隆起型		全层					4	0	T3	N0	M0	2A期	D15A1820	癌/癌旁			67	1	2
癌/癌旁	2009-9-18	生存	2015.7	70		D15A1836	结肠		女	81					无	是	否	腺癌		Ⅱ级	6×5×3.5cm	结肠					溃疡浸润型		浆膜外					13	0	T4a	N0	M0	2B期	D15A1836	癌/癌旁			70	0	2
癌/癌旁	2009-9-24	生存	2015.7	70		D15A1837	结肠		男	58					无	是	否	腺癌		Ⅱ级	8.5×7.5×4.5cm	右半结肠					隆起型		浆膜层					11	0	T3	N0	M0	2A期	D15A1837				70	0	2
癌/癌旁	2009-9-25	生存	2015.7	70		D15A1838	结肠		男	62					无	是	否	腺癌		Ⅰ级	5.5×4.5×1.5cm	结肠肝曲					盘状隆起型		浆膜					19	0	T3	N0	M0	2A期	D15A1838				70	0	2
癌/癌旁	2009-9-25	生存	2015.7	70		D15A1839	结肠		男	73					无	是	否	腺癌		Ⅱ级	5×5×1.5cm	乙结肠					浸润溃疡型		浆膜外					8	0	T4a	N0	M0	2B期	D15A1839	癌/癌旁			70	0	2
癌/癌旁	2009-9-29	生存	2015.7	70		D15A1841	结肠		女	50					无	是	否	腺癌		Ⅱ级	6×4×1cm	右半结肠					环周浸润型		浆膜层					12	0	T3	N0	M0	2A期	D15A1841	癌/癌旁			70	0	2
癌/癌旁	2009-9-30	生存	2015.7	70		D15A1842	结肠		男	62					无	是	否	腺癌		Ⅱ级	7×4.5×2cm	右半结肠					环周浸润型		浆膜层	有	侵犯肾周组织			14	0	T4b	N0	M0	2C期	D15A1842				70	0	2
癌/癌旁	2009-10-9	死亡	2011-05-23	19		D15A1904	结肠		女	27					无	是	否	印戒细胞癌		Ⅲ级	4×4×1.5cm	降结肠					盘状隆起型		浆膜外					6	6	T4a	N2a	M0	3C期	D15A1904	癌/癌旁			19	1	3
癌/癌旁	2009-10-9	死亡	2012-09-21	35		D15A1907	结肠		男	54					无	是	否	腺癌		Ⅱ级	5×5×2cm	右半结肠					浸润性		浆膜					3	0	T3	N0	M0	2A期	D15A1907	癌/癌旁			35	1	2
癌/癌旁	2009-10-16	生存	2015.7	69		D15A1914	结肠		女	77					无	是	否	腺癌		Ⅰ-Ⅱ级	——	结肠脾曲					环周浸润型		浆膜外			淋巴管		6	1	T4a	N1a	M0	3B期	D15A1914	癌/癌旁			69	0	3
癌/癌旁	2009-10-16	生存	2015.7	69		D15A1915	结肠		女	55					无	是	否	腺癌		Ⅱ级	9×6×2cm	乙状结肠					隆起型		浆膜外					8	2	T4a	N1b	M0	3B期	D15A1915	癌/癌旁			69	0	3
癌/癌旁	2009-10-20	生存	2015.7	69		D15A1917	结肠		男	66					无	是	否	腺癌		Ⅱ级	2.7×2.2×1.3cm	乙结肠					隆起型		肌层					3	0	T2	N0	M0	1期	D15A1917	癌/癌旁			69	0	1
癌/癌旁	2009-10-20	死亡	2013-04-22	42		D15A1918	结肠		男	60					无	是	否	腺癌		Ⅱ级	3.5×2×1.5cm	乙状结肠					盘状隆起型		浆膜					8	7	T3	N2b	M0	3C期	D15A1918	癌/癌旁			42	1	3
癌/癌旁	2009-10-21	死亡	2011-05-03	19		D15A1919	结肠		男	65					无	是	否	腺癌		Ⅱ级	5×5×1.8cm	乙结肠					隆起型		浆膜层					9	6	T3	N2a	M0	3B期	D15A1919	癌/癌旁			19	1	3
癌/癌旁	2009-10-21	生存	2015.7	69		D15A1920	结肠		女	81					无	是	否	腺癌		Ⅱ级	10×5.5×2.5cm	升结肠					隆起型		浆膜层					10	3	T3	N1b	M0	3B期	D15A1920				69	0	3
癌/癌旁	2009-10-21	死亡	2011-01-25	15		D15A1921	结肠		男	56					无	是	否	腺癌		Ⅱ级	6×6×2.5cm	乙结肠					浸润溃疡型		浆膜					8	3	T3	N1b	M0	3B期	D15A1921	癌/癌旁			15	1	3
癌/癌旁	2009-10-26	死亡	2015-05-24	67		D15A1923	结肠		男	54					无	是	否	腺癌		Ⅱ级	6.5×5×2.5cm	乙状结肠					环周浸润型		浆膜外					8	2	T4a	N1b	M0	3B期	D15A1923	癌/癌旁			67	1	3
癌/癌旁	2009-10-26	生存	2015.7	69		D15A1928	结肠		女	52					无	是	否	腺癌		Ⅱ级	5.5×4.5×1.5cm	横结肠					盘状隆起型		深肌层					13	0	T2	N0	M0	1期	D15A1928	癌/癌旁			69	0	1
癌/癌旁	2009-10-29	死亡	2011-09-26	23		D15A1929	结肠		女	62					无	是	否	腺癌		Ⅰ-Ⅱ级	5×4×3cm	升结肠					浸润溃疡型		浆膜外					5	2	T4a	N1b	M0	3B期	D15A1929	癌/癌旁			23	1	3
癌/癌旁	2009-10-30	死亡	2011-05-24	19		D15A1927	结肠		男	67					无	是	否	腺癌		Ⅱ级	6×5×1cm	乙结肠					溃疡浸润型		浆膜					6	1	T3	N1a	M0	3B期	D15A1927	癌/癌旁			19	1	3
癌	2009-2-9	生存	2015.7	77		D15A1502	结肠		女	68					无	是	否	腺癌		Ⅱ级	6×3×2cm	结肠肝曲	浸润型，侵至浆膜											5	0	T3	N0	M0	2A期	D15A1502	癌/癌旁			77	0	2
癌	2009-2-9	生存	2015.7	77		D15A1503	结肠		男	39					无	是	否	腺癌		Ⅱ级	6×4×3cm	横结肠	浸润溃疡型，侵至浆膜外											6	0	T4a	N0	M0	2B期	D15A1503	癌/癌旁			77	0	2
癌	2009-3-17	死亡	2013-11-17	56		D15A1561	结肠		男	55					无	是	否	腺癌		Ⅱ级	3.5×3.5×1cm	结肠脾曲	浸润溃疡型，侵至浆膜外									神经		6	4	T4a	N2a	M0	3C期	D15A1561	癌/癌旁			56	1	3
癌	2009-3-19	死亡	2010-08-06	17		D15A1562	结肠		男	73					十二指肠壁、肾周围见癌结节	是	否	腺癌，部分未分化癌		Ⅲ-Ⅳ级	6.5×5×1.5cm	升结肠	浸润溃疡型，侵至浆膜外，十二指肠壁、肾周围见癌结节											7	0	T4a	N0	M1b	4B期	D15A1562	癌/癌旁			17	1	4
癌	2009-4-14	生存	2015.7	75		D15A1576	结肠		女	70					无	是	否	腺癌		Ⅱ级	4.5×2×1cm	直、乙结肠交界处	盘状隆起型，侵至深肌层											2	0	T2	N0	M0	1期	D15A1576	癌/癌旁			75	0	1
癌	2009-4-15	死亡	2011-03-25	23		D15A1577	结肠		女	66					无	是	否	腺癌		Ⅱ-Ⅲ级	5×4×1.5cm	升结肠	盘状隆起型，侵至浆膜外，侵犯肝脏									淋巴管		7	3	T4b	N1b	M0	3C期	D15A1577	癌/癌旁			23	1	3
癌	2009-5-31	死亡	2009-06-23	1		D15A1669	结肠		女	48					无	是	否	腺癌		Ⅱ级	8×7×2cm	右半结肠					环周浸润型		浆膜层					14	0	T3	N0	M0	2A期	D15A1669	癌/癌旁			1	1	2
癌	2009-9-23	死亡	2014-07-24	58		D15A1845	结肠		女	47					无	是	否	腺癌		Ⅱ级	4.5×3.5×1cm	乙结肠					浸润性		浆膜					11	0	T3	N0	M0	2A期	D15A1845				58	1	2
